# Supplementary material
Source: PubMed Central journal article supplement (PMC4433742)
Supplement: NIHMS686014-supplement-Slide.pdf [file NIHMS686014-supplement-Slide.pdf]

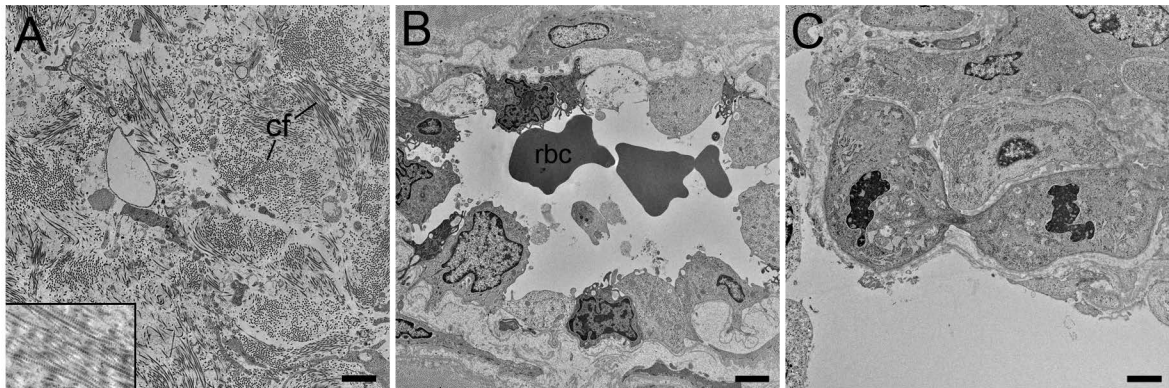

**Supplemental Figure 1. Ultrastructural features of a GBM biopsy removed from a 61 year old male.** (A) Example of a region rich in collagen-like fibers (cf). Inset shows a magnified view of cf. (B) Example of a blood vessel containing red blood cells (rbc). (C) Example of a mitotic cell undergoing cytokinesis. All scale bars = 2 $\mu$ m.
